# Supplementary material for: Fast and Ultrasensitive Glycoform Analysis by Supercritical Fluid Chromatography–Tandem Mass Spectrometry
Source: PubMed Central journal article supplement — Anal Chem. 2022 Nov 8;94(46):15948–55. doi: 10.1021/acs.analchem.2c01721 (PMC9685587; doi:10.1021/acs.analchem.2c01721), 2022-11-08
Supplement: ac2c01721_si_001.pdf [file ac2c01721_si_001.pdf]

Supporting Information (SI) for

## **Fast and ultrasensitive glycoform analysis by supercritical fluid chromatography-tandem mass spectrometry**

Yoshimi Haga<sup>1</sup>, Masaki Yamada<sup>2</sup>, Risa Fujii<sup>1</sup>, Naomi Saichi<sup>1</sup>, Takashi Yokokawa<sup>3</sup>, Toshihiro Hama<sup>3</sup>, Yoshihiro Hayakawa<sup>2</sup>, and Koji Ueda<sup>1\*</sup>

<sup>1</sup>Cancer Proteomics Group, Cancer Precision Medicine Center, Japanese Foundation for Cancer Research, 3-8-31 Ariake, Koto-ku, Tokyo 135-8550, Japan

<sup>2</sup>Global Application Development Center, Shimadzu Corporation, Nishinokyo Kuwabara-cho 1, Nakagyo-ku, Kyoto 604-8511, Japan

<sup>3</sup>Department of Pharmacy, Cancer Institute Hospital, Japanese Foundation for Cancer Research, 3-8-31 Ariake, Koto-ku, Tokyo 135-8550, Japan

**\* Corresponding author:** Koji Ueda

E-mail: [koji.ueda@jfcr.or.jp](mailto:koji.ueda@jfcr.or.jp)

This SI contains the following:

Figure S1: MALDI-TOF-MS spectrum of time course experiments under acetylation of N-glycans

Figure S2: MALDI-TOF-MS spectrum of acetylated N-glycans

Figure S3: MS/MS fragmentation spectra of peracetylated N-glycans

Figure S4: The energy-resolved product ion profiles of various peracetylated N-glycans

Figure S5: Identification of resolution of LCMS-8050 to evaluate the cross-talk

Figure S6: The energy-resolved product ion profiles of peracetylated N-glycans

Figure S7: Comparison of therapeutic IgG N-glycan analysis of fluorescence HPLC and SFC-MS

Figure S8: Elution profile of N-glycans from therapeutic antibodies analyzed by fluorescent HPLC

Figure S9: Inter- and intraday repeatability of low-abundance glycan analysis by SFC-Erexim

Figure S10: Comparison of N-glycans from five therapeutic antibodies

Figure S11: Evaluation of lot-to-lot heterogeneity for major fucosylated N-glycans

Figure S12: Evaluation of lot-to-lot heterogeneity for high mannose-type N-glycans

Table S1: Masses and identities of acetylated glycan-derived fragment ions

Table S2: MRM parameters for quantification of antibody drug glycoforms

Table S3: List of therapeutic antibodies analyzed in this study

Table S4: Relative abundance (%) of detected glycoforms of each therapeutic antibody

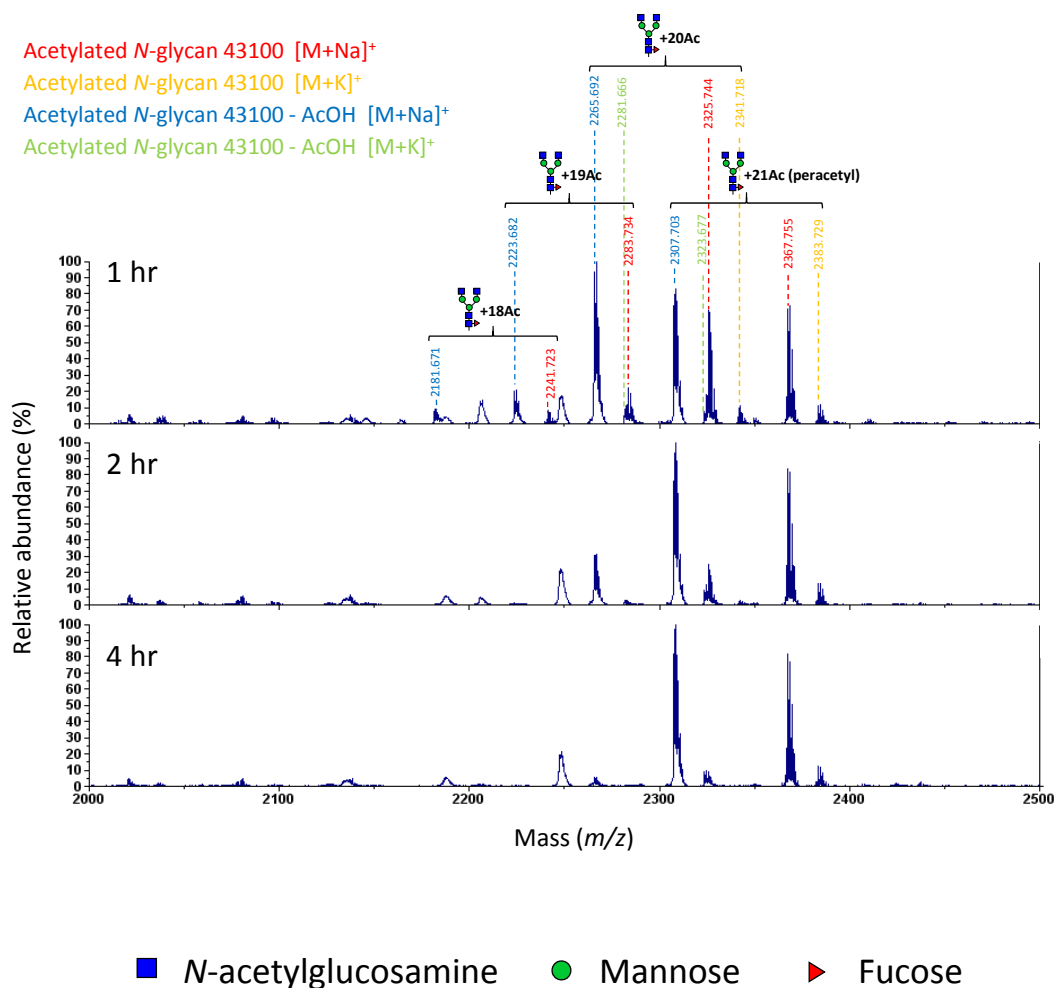

**Figure S1. MALDI-TOF-MS spectrum of time course experiments under acetylation of *N*-glycans.** The released *N*-glycans from Bevacizumab were acetylated at 50 °C for indicated time. De-acetic acid forms (blue and green) were MALDI-specific byproducts.

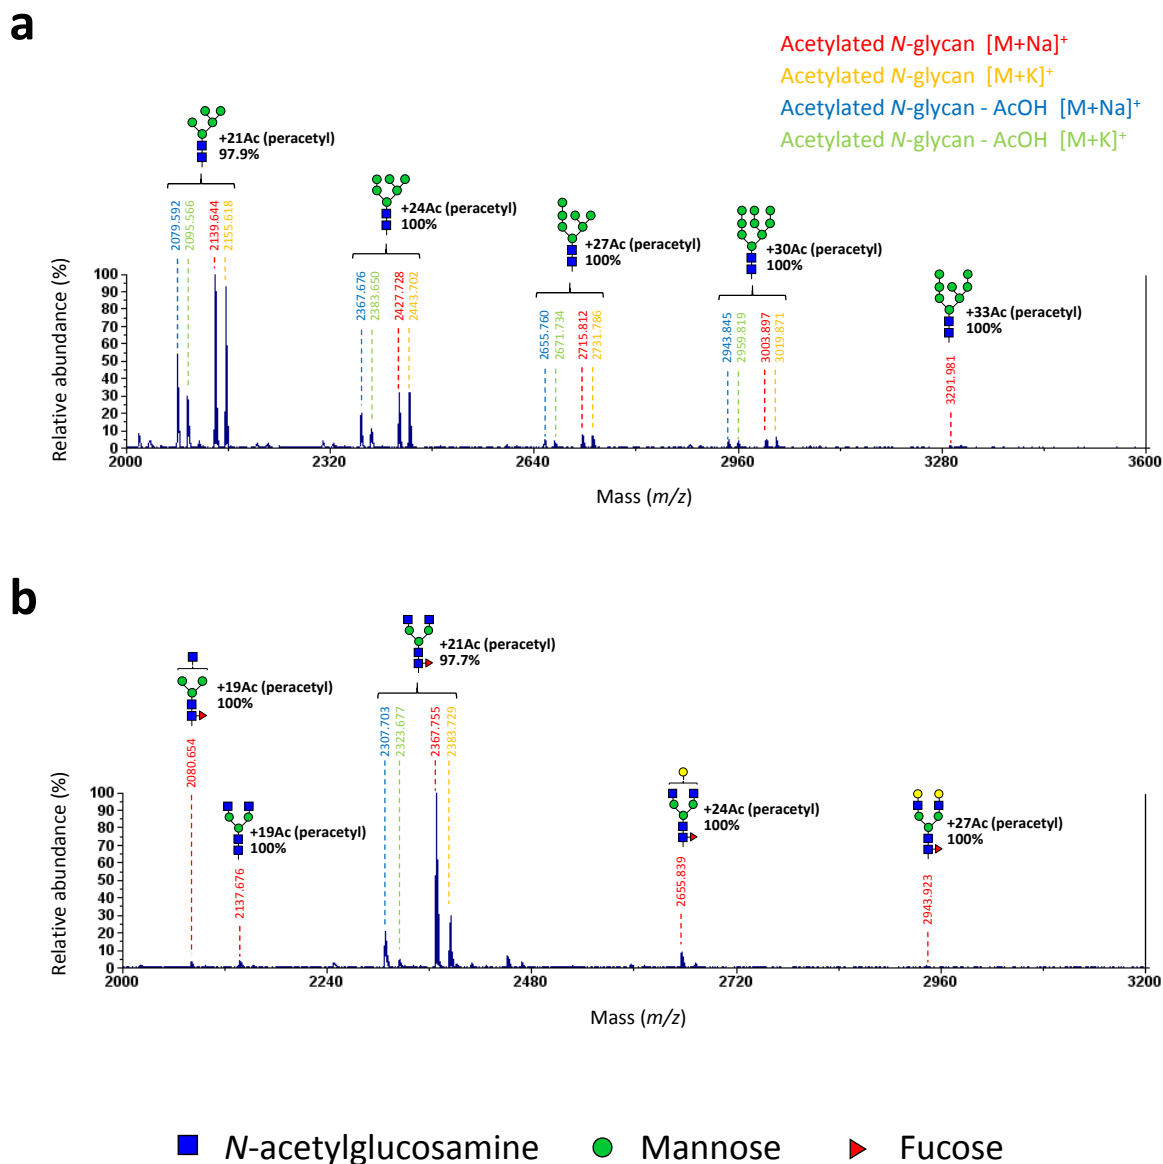

**Figure S2. MALDI-TOF-MS spectrum of acetylated *N*-glycans.** The released *N*-glycans from (a) RNase B and (b) Bevacizumab were acetylated at 50 °C for 4 hr. The percentages in the figure indicate the efficiency of labeling (i.e. peracetylation). De-acetic acid forms (blue and green) were MALDI-specific byproducts.

**a**

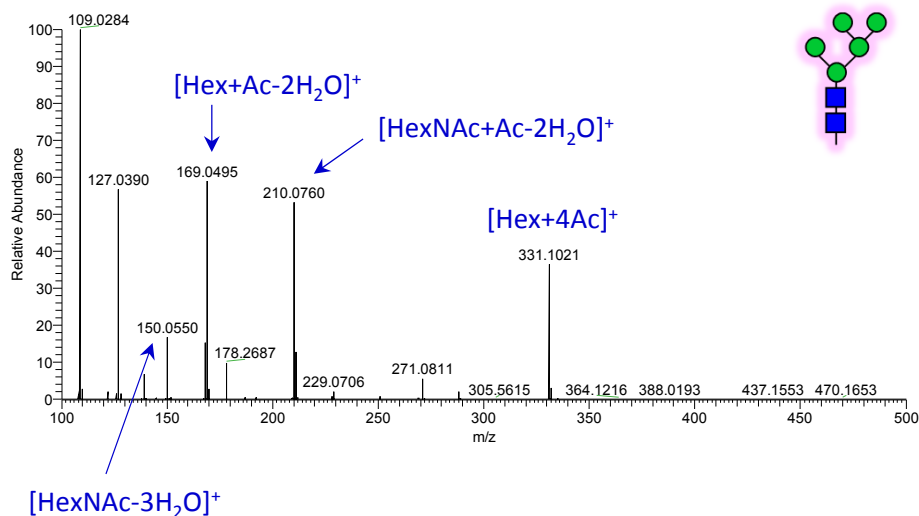

**b**

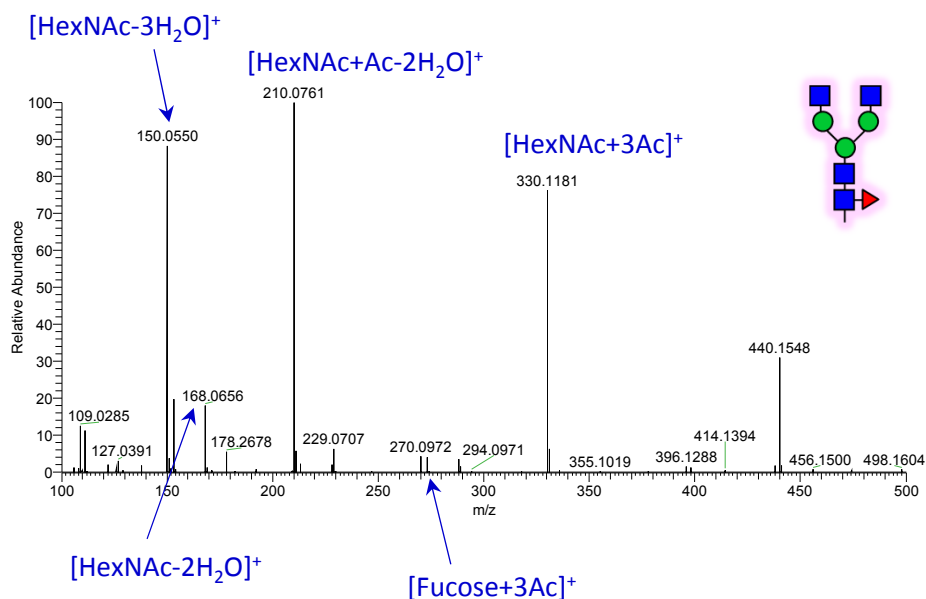

■ *N*-acetylglucosamine

● Mannose

▶ Fucose

**Figure S3. MS/MS fragmentation spectra of peracetylated N-glycans.** Acetylated N-glycans were dissolved in methanol, directly infused and analyzed by Orbitrap Fusion Lumos (Thermo Fisher Scientific). Product ion spectrum of the  $[M+H]^+$  ion at (a)  $m/z$  2117.65 (Peracetylated Glycan 25000, prepared from RNase B), (b)  $m/z$  2345.77 (Peracetylated Glycan 43100, prepared from bevacizumab).

# Figure S4

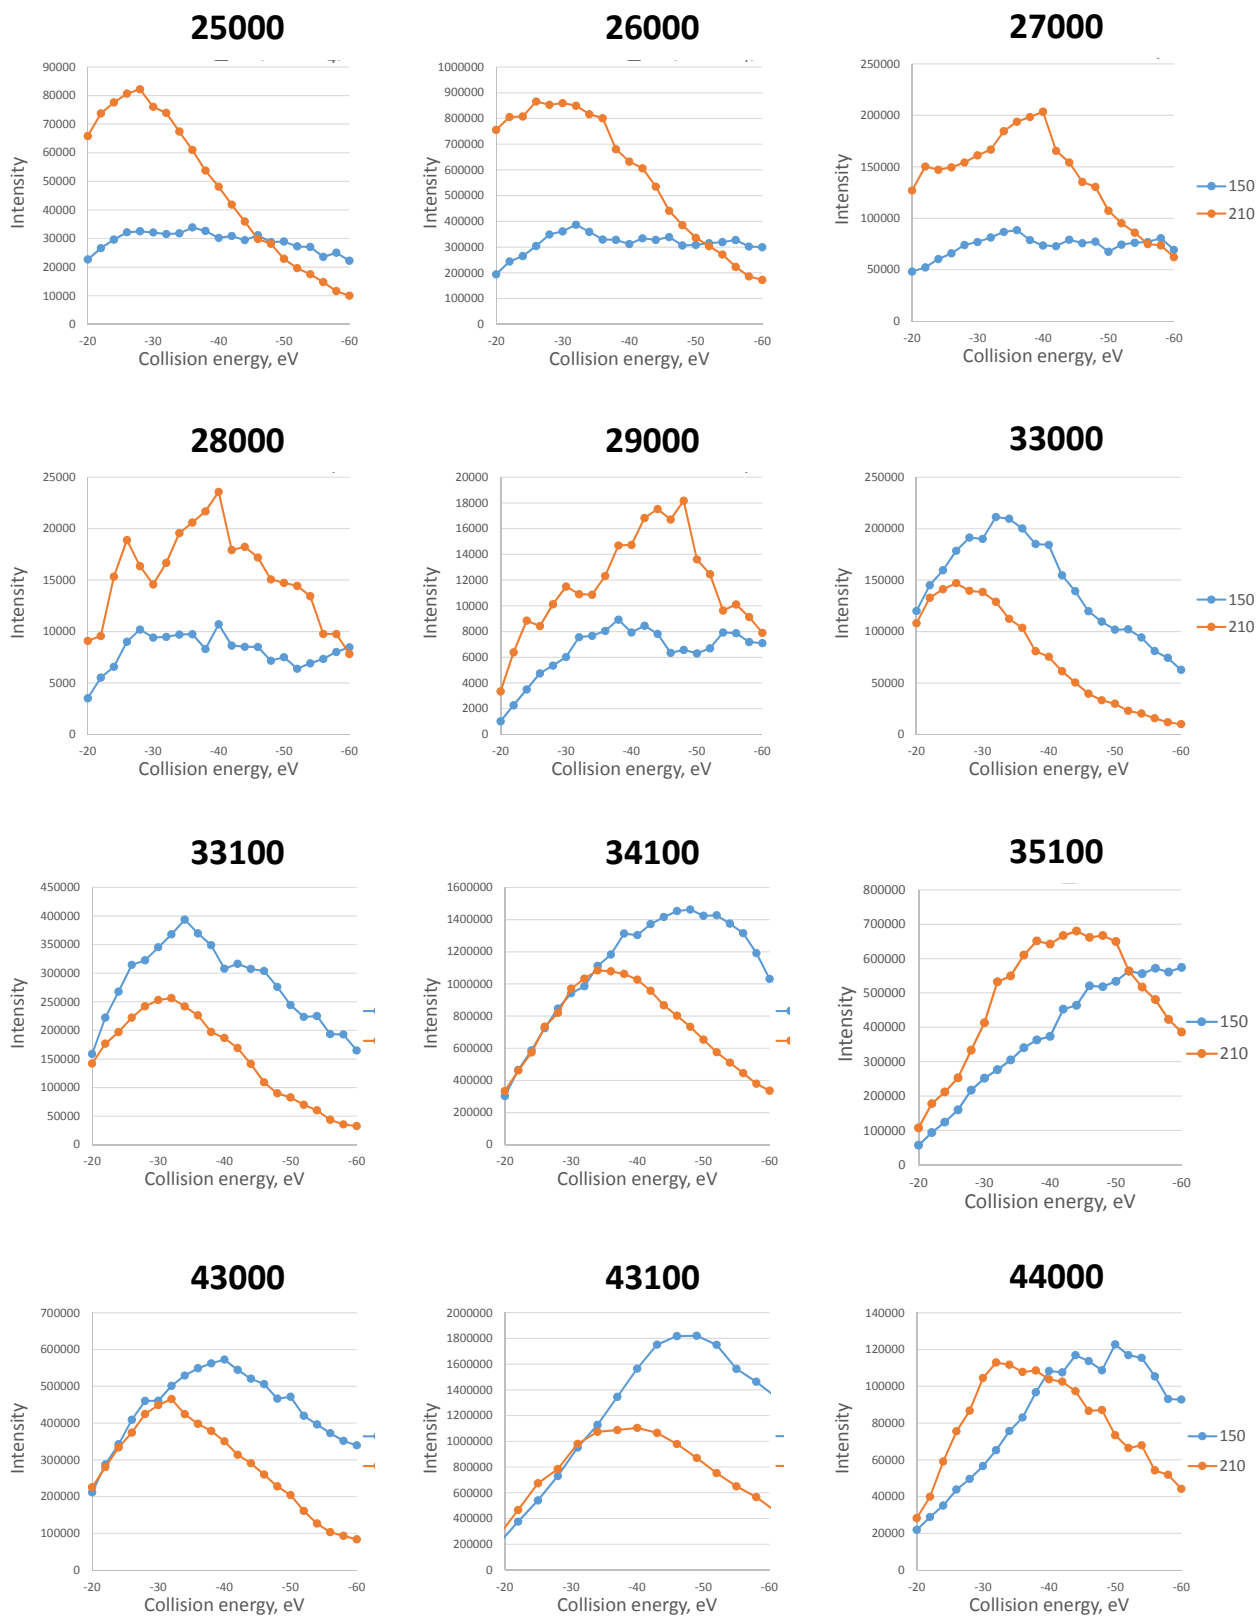

## Figure S4 (continued)

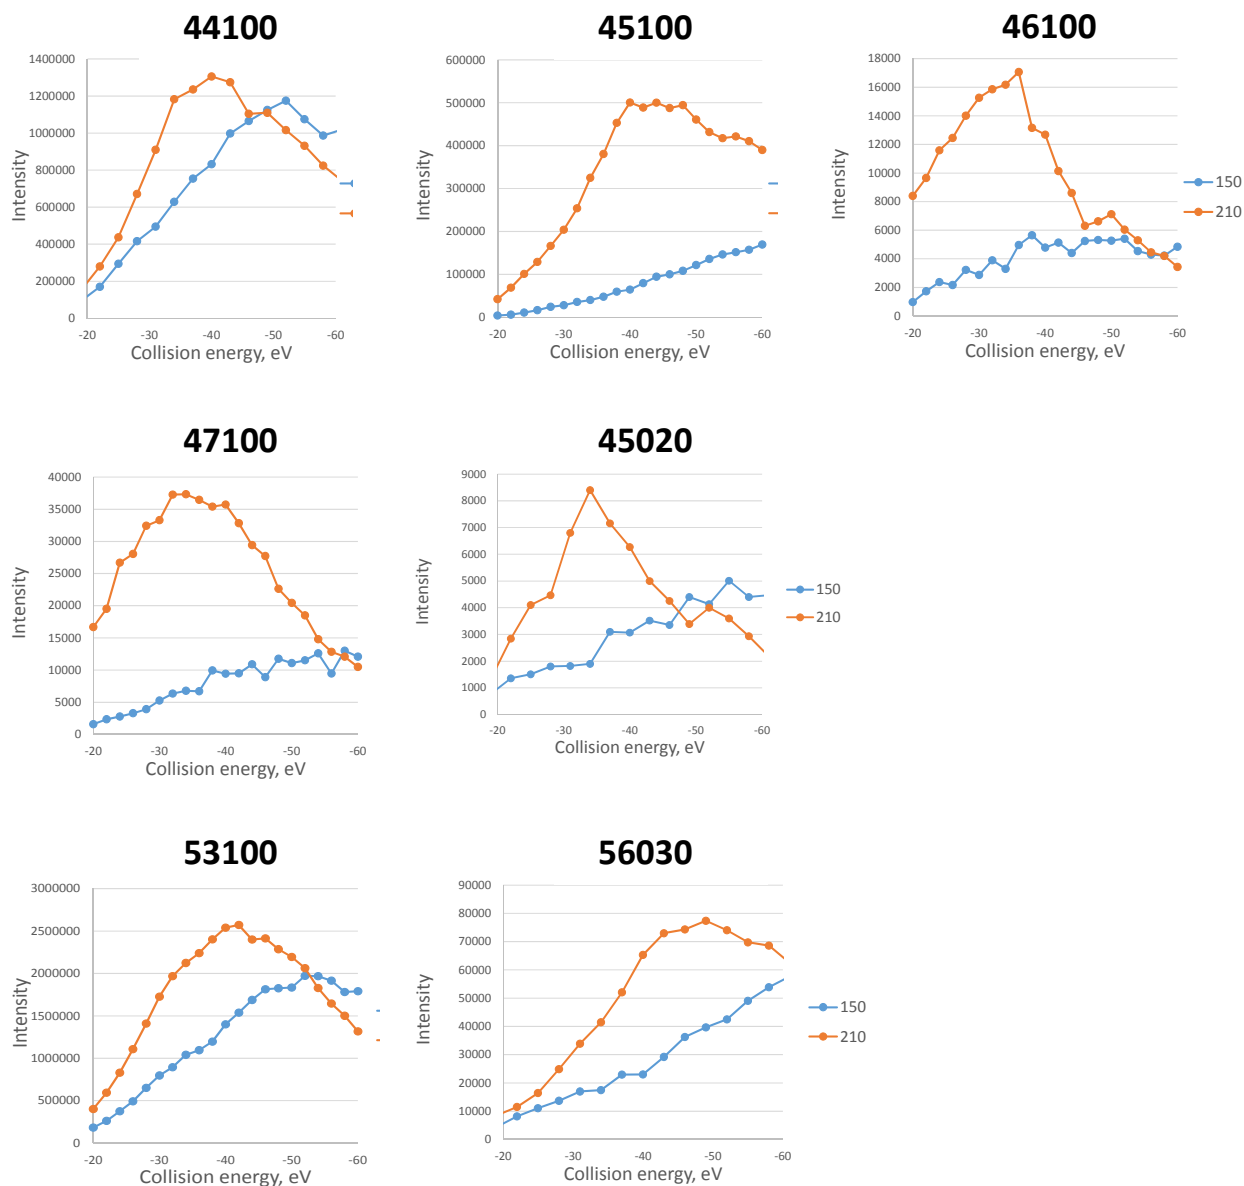

**Figure S4. The energy-resolved product ion profiles of various peracetylated N-glycans.** The CE-breakdown curves of representative per-acetylated N-glycan.  $m/z = 150.1$  (HexNAc  $- 3H_2O$ ),  $m/z = 210.1$  (HexNAc + Ac  $- 2H_2O$ ). Glycan composition is shown as Glycan ID, 5 digits correspond to: HexNAc, Hexose, Fucose, Neu5Ac, Neu5Gc.

# Figure S5

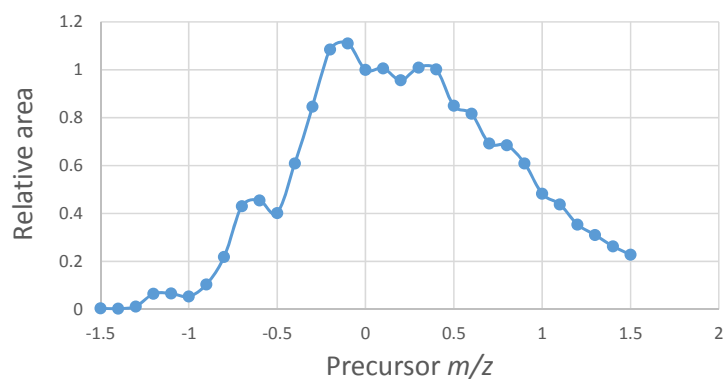

| Precursor m/z | Relative area |
|---------------|---------------|
| -1.5          | 0.00415       |
| -1.4          | 0.003165      |
| -1.3          | 0.012028      |
| -1.2          | 0.06529       |
| -1.1          | 0.066058      |
| -1            | 0.053882      |
| -0.9          | 0.104634      |
| -0.8          | 0.21938       |
| -0.7          | 0.430509      |
| -0.6          | 0.454726      |
| -0.5          | 0.401971      |
| -0.4          | 0.609732      |
| -0.3          | 0.846112      |
| -0.2          | 1.084771      |
| -0.1          | 1.110006      |
| 0             | 1             |
| 0.1           | 1.006244      |
| 0.2           | 0.956488      |
| 0.3           | 1.009151      |
| 0.4           | 1.001702      |
| 0.5           | 0.850075      |
| 0.6           | 0.816349      |
| 0.7           | 0.693122      |
| 0.8           | 0.685507      |
| 0.9           | 0.609663      |
| 1             | 0.482873      |
| 1.1           | 0.438063      |
| 1.2           | 0.354103      |
| 1.3           | 0.310191      |
| 1.4           | 0.263247      |
| 1.5           | 0.228236      |

**Figure S5. Identification of resolution of LCMS-8050 to evaluate the cross-talk.** Peak area curve for Glycoform 43100 acquired at 0.1 Da intervals of precursor  $m/z$ .



# Figure S6

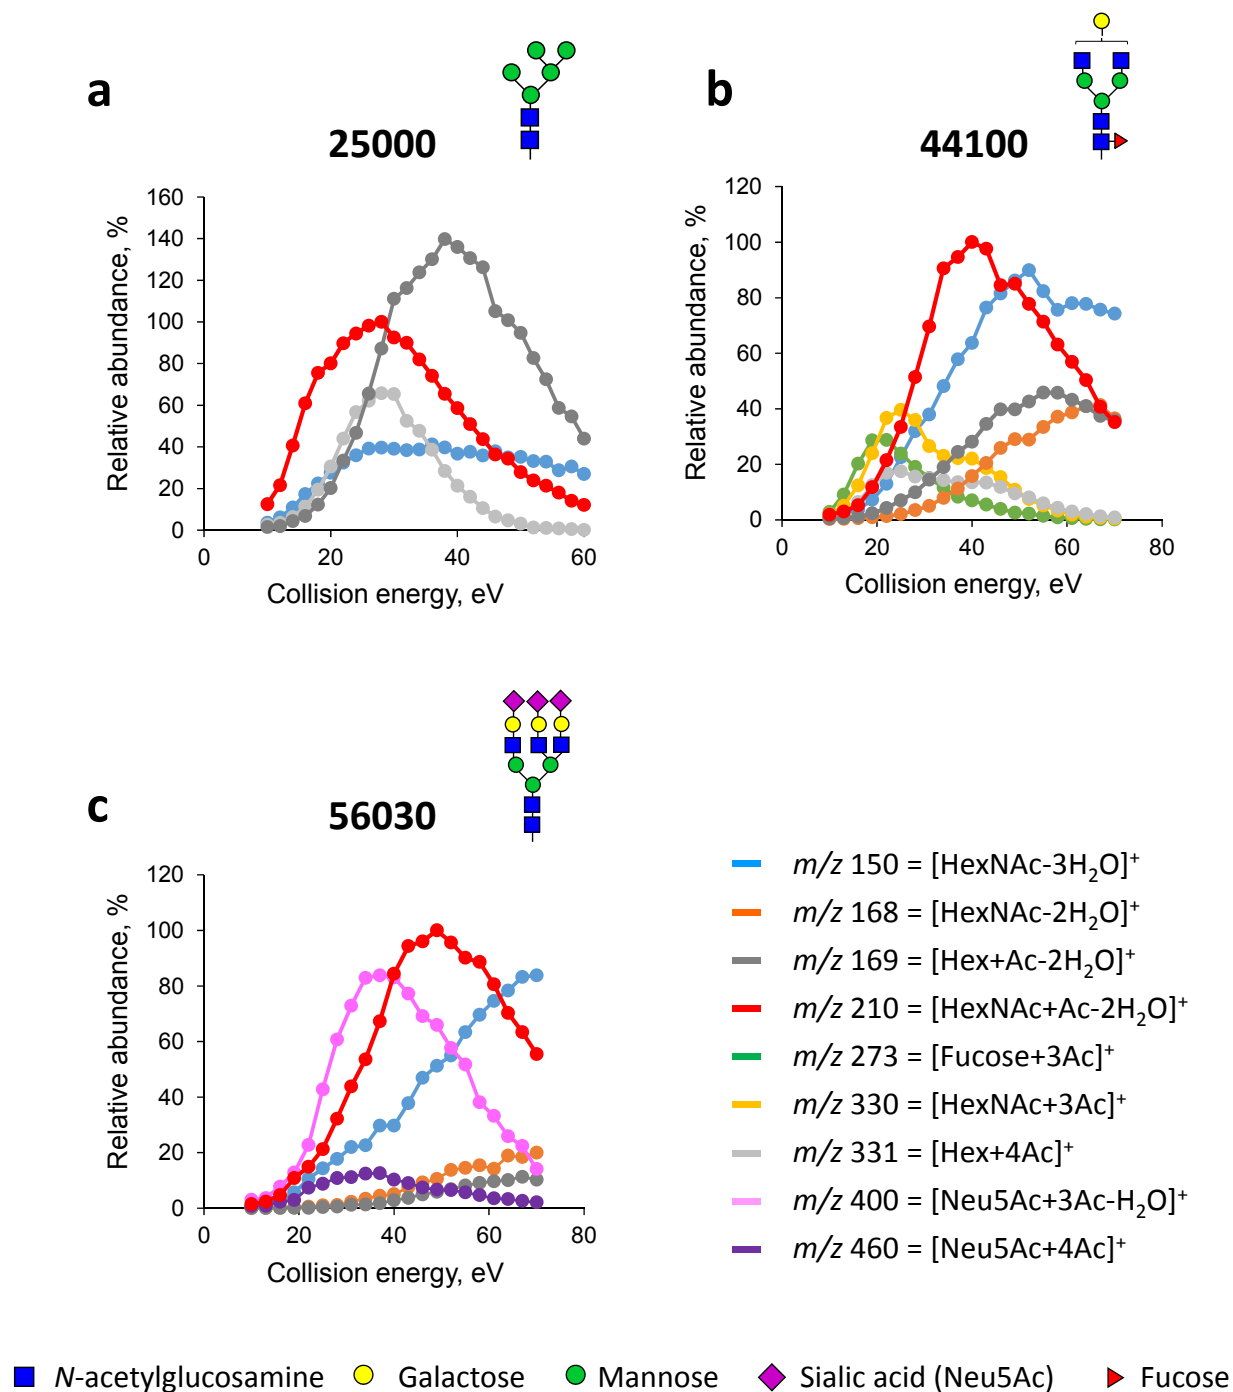

**Figure S6. The energy-resolved product ion profiles of per-acetylated N-glycans.** The Collision energy (CE)-breakdown curves of representative peracetylated N-glycan (Glycan ID: (a) 25000, (b) 44100, and (c) 56030). Glycan composition is shown as Glycan ID, 5 digits correspond to: HexNAc, Hexose, Fucose, Neu5Ac, Neu5Gc.

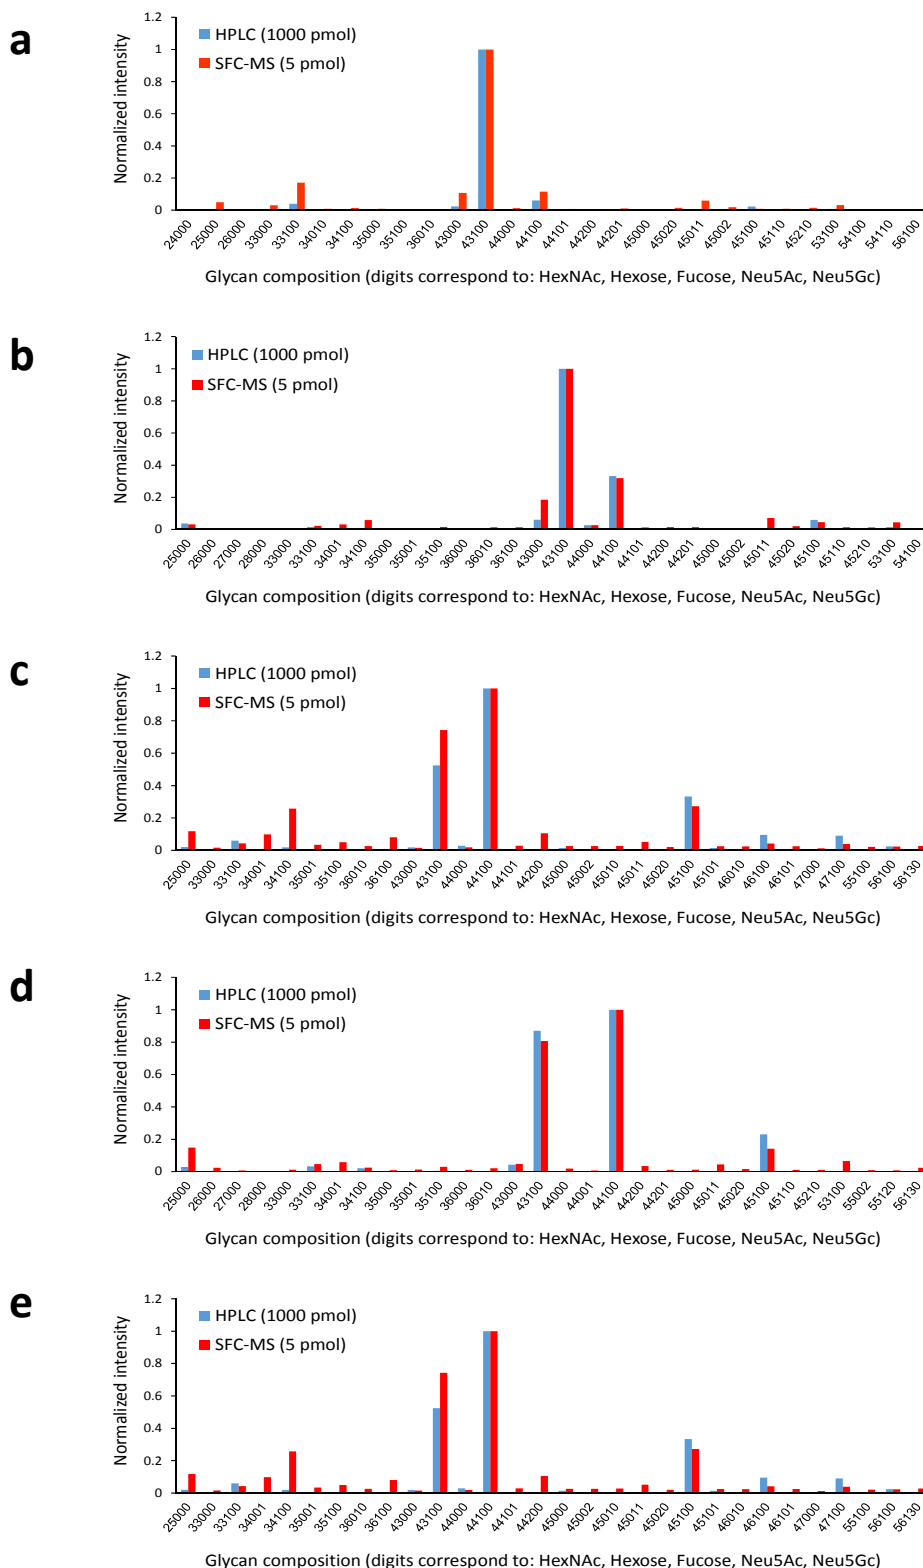

**Figure S7. Comparison of therapeutic IgG N-glycan analysis of fluorescence HPLC and SFC-MS.** Relative abundances observed for the top 30 N-glycans of (a) bevacizumab, (b) nivolumab, (c) ramucirumab, (d) rituximab, and (e) trastuzumab from HPLC analysis or SFC-MS analysis.

Figure S8

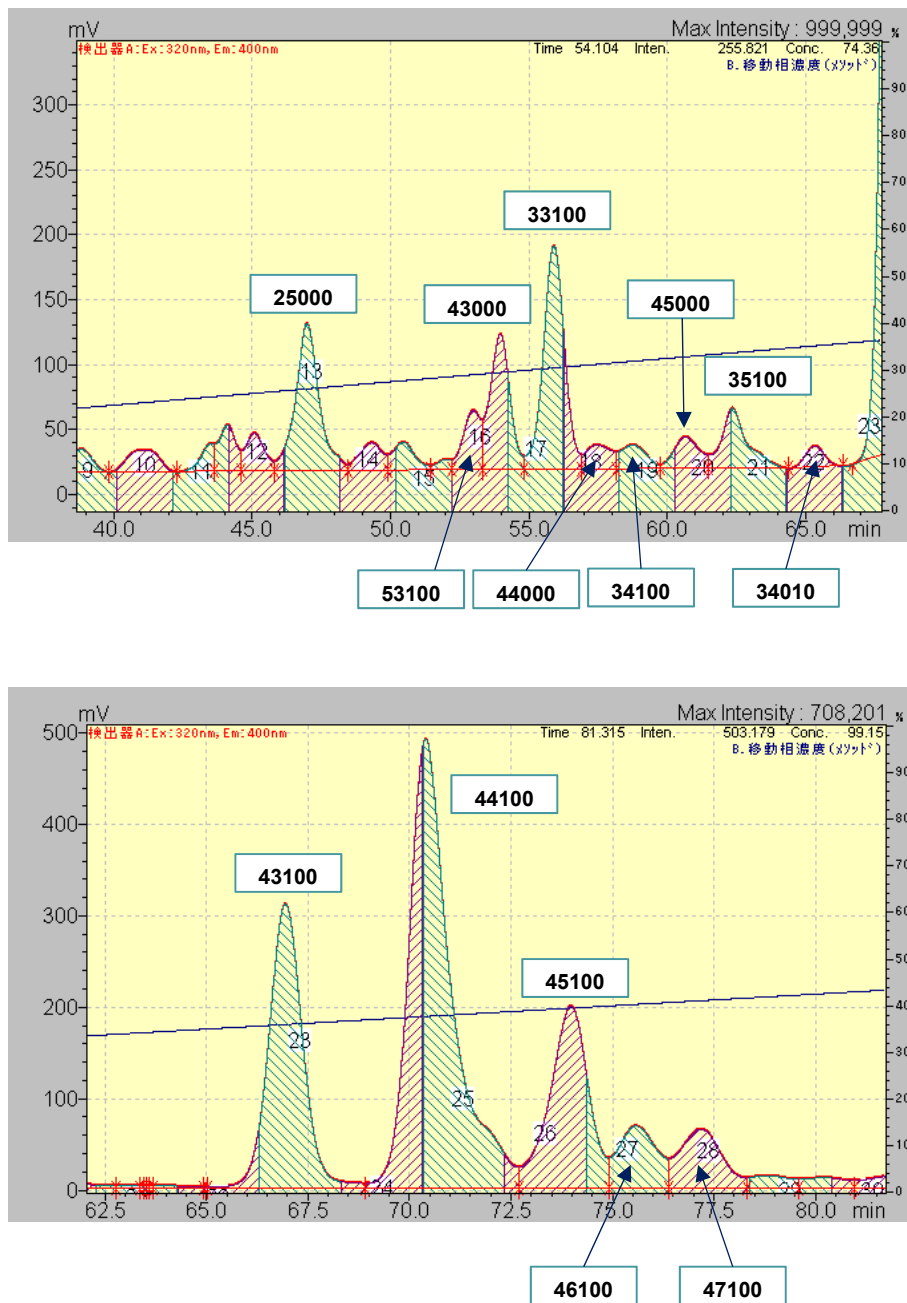

Figure S8. Elution profile of N-glycans from therapeutic antibodies analyzed by fluorescent HPLC. PA-derivatized N-glycans prepared from therapeutic antibodies were analyzed by reversed-phase HPLC.

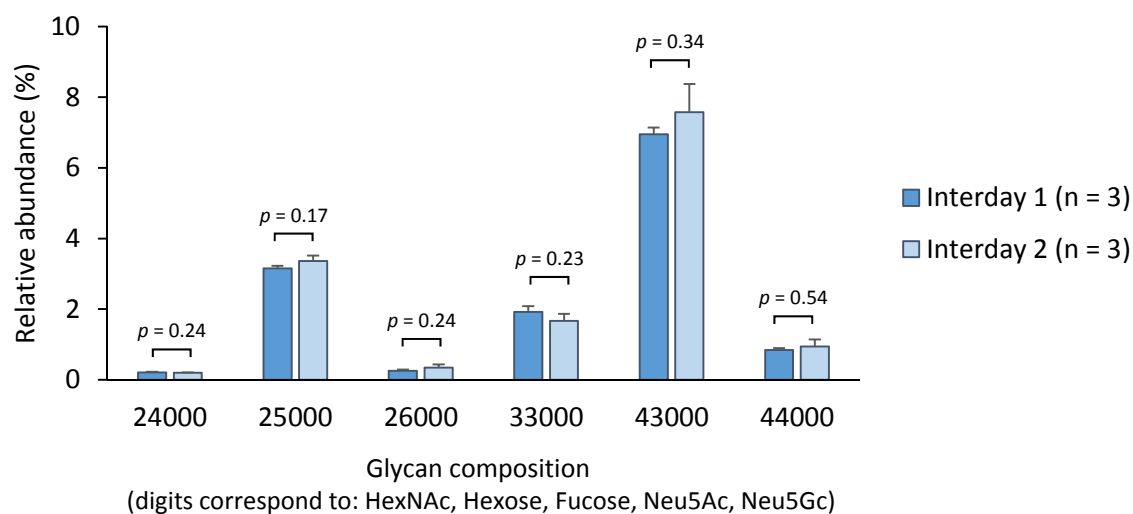

**Figure S9. Inter- and intraday repeatability of low abundance glycan analysis by SFC-Erexim.** The released N-glycans from bevacizumab were analyzed after acetylation. Error bars represent the standard deviation (intraday n = 3, independent technical experiments). The p-values were calculated by Student t-test.

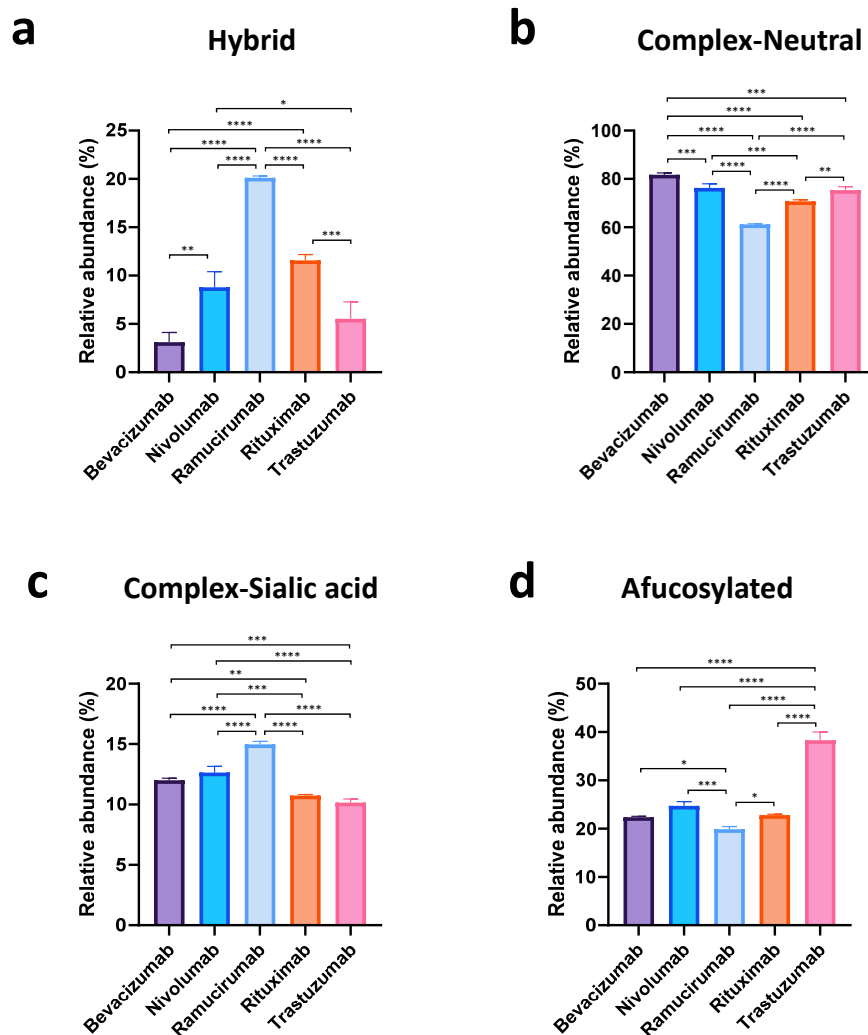

**Figure S10. Comparison of N-glycans from five therapeutic antibodies.** Relative abundances of (a) hybrid, (b) complex-neutral, (c) complex-sialic acid containing, and (d) afucosylated glycans of five therapeutic antibodies. Error bars represent the standard deviation ( $n = 3$ , independent technical experiments). The  $p$ -values were calculated by Tukey's multiple comparisons test. Only statistically significant differences are shown. \*  $P < 0.05$ , \*\*  $P < 0.01$ , \*\*\*  $P < 0.001$ , \*\*\*\*  $P < 0.0001$ .

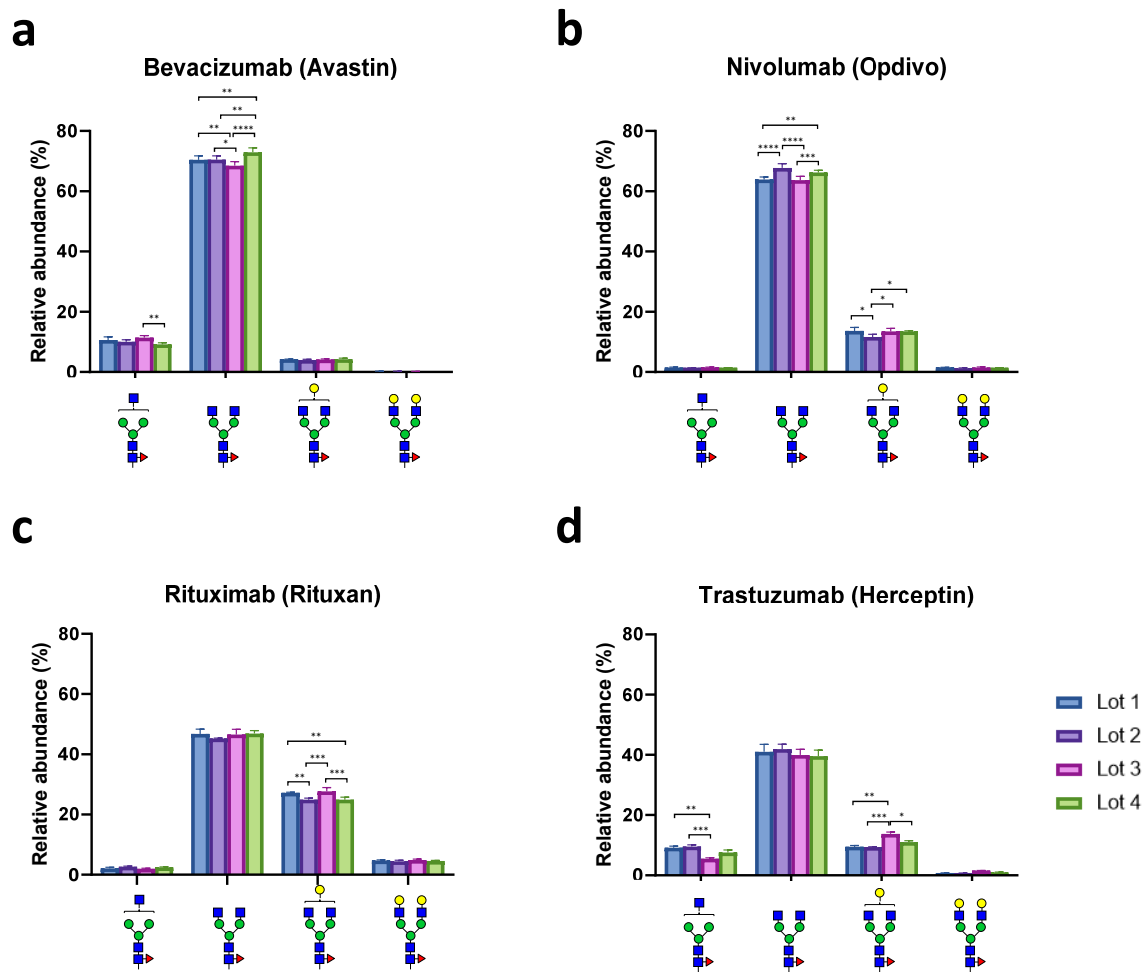

**Figure S11. Evaluation of lot-to-lot heterogeneity for major fucosylated N-glycans.** Relative abundances of Glycoform 33100, 43100, 44100, and 45100 of four lots of (a) bevacizumab, (b) nivolumab, (c) rituximab, and (d) trastuzumab. Error bars represent the standard deviation (n = 3, independent technical experiments). The *p*-values were calculated by Tukey's multiple comparisons test. Only statistically significant differences are shown. \**P* < 0.05, \*\**P* < 0.01, \*\*\**P* < 0.001, \*\*\*\**P* < 0.0001.

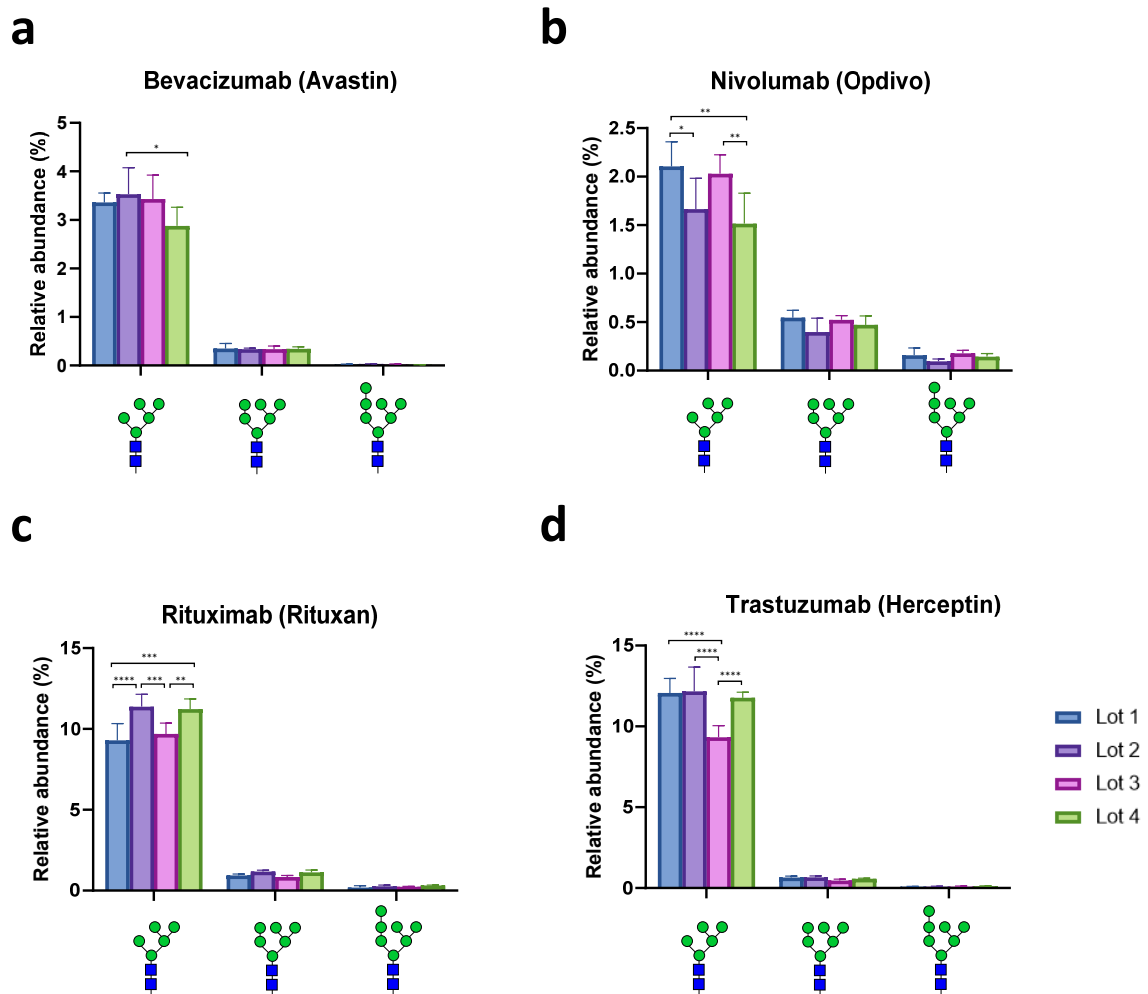

**Figure S12. Evaluation of lot-to-lot heterogeneity for high mannose-type N-glycans.** Relative abundances of Glycoform 25000, 26000, and 27000 of four lots of (a) bevacizumab, (b) nivolumab, (c) rituximab, and (d) trastuzumab. Error bars represent the standard deviation ( $n = 3$ , independent technical experiments). The  $p$ -values were calculated by Tukey's multiple comparisons test. Only statistically significant differences are shown. \* $P < 0.05$ , \*\* $P < 0.01$ , \*\*\* $P < 0.001$ , \*\*\*\* $P < 0.0001$ .
